# Supplementary material
Source: publisher site journal article supplement (https://www.spandidos-publications.com/4996/downloadSupplementary)
Supplement: Supplementary file 1 [file downloadSupplementary]

## Sheet: Sheet2
Table SI. Clinicopathological variables of patients in the external validation cohort
age	gender	Fuhrman	T	N	M	stage	metastasis / recurrence	PFS	death	OS	T H-SCORE	N H-SCORE
53	1	2	2a	0	0	2	0	39	0	39	0	#N/A
60	1	2	1b	0	0	1	1	25	0	39	0	6
51	0	2	1b	0	0	1	0	42	0	42	0	7
55	0	3	1b	0	0	1	0	42	0	42	1	12
34	0	1	1a	0	0	1	0	40	0	40	2	3
70	1	3	3a	0	0	3	0	42	0	42	2	6
69	0	3	1a	0	0	1	0	42	0	42	2	7
49	0	2	1a	0	0	1	0	62	0	62	2	4
60	0	3	1b	0	0	1	0	37	0	37	3	1
61	1	2	1b	0	0	1	0	40	0	40	3	8
38	1	1	1a	0	0	1	0	40	0	40	3	5
26	1	1	1b	0	0	1	0	43	0	43	3	5
39	1	2	2a	0	0	2	0	45	0	45	3	12
55	1	2	1a	0	0	1	0	47	0	47	3	6
41	1	1	1a	0	0	1	0	61	0	61	3	#N/A
67	1	2	1b	0	0	1	0	61	0	61	3	9
67	1	3	1b	0	0	1	0	33	0	33	4	8
69	0	2	1a	0	0	1	0	36	0	36	4	0
44	1	2	1a	0	0	1	0	39	0	39	4	3
44	1	2	1a	0	0	1	0	39	0	39	4	3
67	1	3	1a	0	0	1	0	39	0	39	4	6
58	1	4	3a	0	0	3	0	40	0	40	4	6
50	1	2	1a	0	0	1	0	40	0	40	4	0
47	1	2	1a	0	0	1	0	40	0	40	4	6
61	1	4	2a	0	0	2	0	40	0	40	4	2
74	0	2	1b	0	0	1	0	43	0	43	4	3
59	1	3	3a	0	0	3	1	18	0	45	4	#N/A
42	1	1	1a	0	0	1	0	46	0	46	4	#N/A
42	1	2	1a	0	0	1	0	47	0	47	4	6
59	1	2	1b	0	0	1	0	54	0	54	4	8
50	1	1	1b	0	0	1	0	62	0	62	4	6
45	0	2	1a	0	0	1	0	62	0	62	4	6
67	1	1	1a	0	0	1	0	33	0	33	5	3
37	1	3	3a	0	0	3	0	35	0	35	5	1
37	1	2	1a	0	0	1	0	35	0	35	5	3
58	1	3	1b	0	0	1	0	40	0	40	5	2
47	0	1	1a	0	0	1	0	41	0	41	5	2
60	1	4	3a	0	0	3	0	42	0	42	5	12
54	0	2	2a	0	0	2	0	42	0	42	5	7
67	1	2	1a	0	0	1	1	45	0	54	5	7
75	1	2	3a	0	0	3	1	30	1	30	6	0
63	0	2	1b	0	0	1	0	33	0	33	6	4
53	0	2	2a	0	0	2	0	34	0	34	6	7
60	1	4	1a	0	0	1	0	35	0	35	6	8
75	0	3	1b	0	0	1	0	35	0	35	6	8
32	1	2	1b	0	0	1	0	38	0	38	6	0
73	1	1	1b	0	0	1	1	38	1	40	6	9
51	1	4	1a	0	0	1	0	40	0	40	6	6
54	1	2	1a	0	0	1	0	40	0	40	6	8
69	1	2	1a	0	0	1	0	42	0	42	6	2
56	1	2	1b	0	0	1	0	43	0	43	6	4
56	1	1	1a	0	0	1	0	45	0	45	6	0
53	1	1	1a	0	0	1	0	45	0	45	6	8
59	0	2	3a	0	0	3	1	32	0	47	6	0
67	1	2	1b	0	0	1	0	50	0	50	6	9
38	0	2	1a	0	0	1	0	50	0	50	6	1
65	1	2	1b	0	0	1	0	55	0	55	6	3
81	1	1	1a	0	0	1	0	61	0	61	6	#N/A
51	1	2	1b	0	0	1	0	61	0	61	6	2
54	1	2	1b	0	0	1	0	62	0	62	6	4
35	1	3	1a	0	0	1	0	62	0	62	6	#N/A
66	1	2	1a	0	0	1	0	35	0	35	7	1
37	1	2	1a	0	0	1	0	36	0	36	7	7
55	1	1	1a	0	0	1	0	38	0	38	7	6
52	1	2	1a	0	0	1	0	39	0	39	7	6
51	1	4	1a	0	0	1	0	40	0	40	7	0
68	1	2	2b	0	0	2	1	5	1	41	7	8
81	1	3	1a	0	0	1	0	44	0	44	7	4
64	1	2	1a	0	0	1	0	48	0	48	7	6
73	1	3	3a	0	0	3	1	9	1	9	8	2
53	1	2	1a	0	0	1	0	34	0	34	8	6
76	0	2	1a	0	0	1	0	34	0	34	8	7
54	0	2	1b	0	0	1	0	34	0	34	8	2
64	1	2	1a	0	0	1	0	35	0	35	8	6
54	1	2	1a	0	0	1	0	35	0	35	8	1
50	1	2	1b	0	0	1	0	36	0	36	8	8
56	1	3	1a	0	0	1	0	37	0	37	8	2
67	1	2	1a	0	0	1	0	38	0	38	8	4
66	0	2	1a	0	0	1	0	38	0	38	8	4
53	1	3	2b	1	0	3	1	29	0	39	8	0
54	1	2	1a	0	0	1	0	39	0	39	8	0
43	1	2	1a	0	0	1	0	39	0	39	8	6
52	1	2	1a	0	0	1	0	40	0	40	8	4
54	1	2	1b	0	0	1	0	40	0	40	8	4
63	0	4	1a	0	0	1	0	42	0	42	8	2
67	0	2	2a	0	0	2	0	43	0	43	8	2
41	1	2	1b	0	0	1	0	45	0	45	8	#N/A
57	1	1	3b	0	0	3	0	45	0	45	8	10
62	0	2	1a	0	0	1	0	46	0	46	8	5
72	1	2	3a	0	0	3	0	48	0	48	8	3
58	0	2	1a	0	0	1	0	57	0	57	8	6
58	1	2	1a	0	0	1	1	38	1	13	9	6
66	1	2	1b	0	0	1	0	28	1	28	9	8
44	1	2	1b	0	0	1	0	34	0	34	9	6
39	0	2	1a	0	0	1	0	34	0	34	9	4
53	0	2	1a	0	0	1	0	34	0	34	9	11
64	0	2	3a	0	0	3	1	25	1	37	9	3
72	1	3	3a	0	0	3	1	38	1	41	9	6
65	1	2	1a	0	0	1	0	44	0	44	9	3
43	1	2	1a	0	0	1	0	45	0	45	9	#N/A
82	0	1	1a	0	0	1	0	46	0	46	9	#N/A
54	1	1	1a	0	0	1	0	46	0	46	9	5
55	1	2	1b	0	0	1	0	47	0	47	9	6
55	1	2	1b	0	0	1	0	47	0	47	9	6
51	1	2	1b	0	0	1	0	48	0	48	9	10
31	1	2	1a	0	0	1	0	48	0	48	9	5
48	1	3	1a	0	0	1	0	55	0	55	9	2
50	1	3	1a	0	0	1	0	55	0	55	9	8
58	0	2	1b	0	0	1	0	55	0	55	9	6
50	1	2	1b	0	0	1	0	56	0	56	9	4
53	1	2	1a	0	0	1	0	61	0	61	9	#N/A
66	1	2	1a	0	0	1	0	61	0	61	9	9
59	1	2	3a	0	0	3	0	62	0	62	9	#N/A
59	1	2	3c	0	0	3	1	10	1	10	10	4
59	1	2	1a	0	0	1	1	24	1	24	10	6
46	0	3	2b	0	0	2	1	25	1	25	10	4
44	1	2	1b	0	0	1	0	35	0	35	10	2
55	1	2	1a	0	0	1	1	30	0	35	10	2
67	0	2	1b	0	0	1	0	39	0	39	10	6
51	0	1	1b	0	0	1	0	41	0	41	10	8
66	0	2	2a	0	0	2	0	42	0	42	10	5
81	1	2	1b	0	0	1	0	43	0	43	10	2
69	1	2	1a	0	0	1	0	44	0	44	10	6
51	0	1	1a	0	0	1	0	45	0	45	10	6
69	0	2	1a	0	0	1	0	49	0	49	10	9
52	0	2	1b	0	0	1	0	35	0	35	11	8
67	1	2	1b	0	0	1	0	40	0	40	11	2
43	1	2	1a	0	0	1	0	43	0	43	11	9
46	0	1	1a	0	0	1	0	48	0	48	11	3
46	1	2	2a	0	0	2	1	7	1	7	12	4
68	1	3	4	1	0	4	1	10	1	10	12	9
58	1	2	1a	0	0	1	1	38	1	13	12	6
77	0	3	1b	0	0	1	1	0	1	15	12	0
56	1	2	1b	0	0	1	1	20	1	20	12	7
54	0	1	3a	0	0	3	1	11	1	25	12	12
54	0	3	3a	0	0	3	1	8	1	26	12	8
75	0	2	1a	0	0	1	0	33	0	33	12	7
67	1	2	3a	0	0	3	1	23	0	33	12	7
41	1	2	1b	0	0	1	0	34	0	34	12	4
64	0	2	1a	0	0	1	0	34	0	34	12	6
46	1	2	1b	0	0	1	0	34	0	34	12	9
48	1	2	1a	0	0	1	0	34	0	34	12	9
48	1	2	1a	0	0	1	0	34	0	34	12	8
41	0	2	1b	0	0	1	0	34	0	34	12	5
75	1	2	2a	0	0	2	0	34	0	34	12	6
65	0	2	1b	0	0	1	0	35	0	35	12	0
34	1	2	1b	0	0	1	0	35	0	35	12	9
27	1	2	1a	0	0	1	0	35	0	35	12	10
53	1	4	1a	0	0	1	1	24	1	36	12	12
59	0	2	1b	0	0	1	0	36	0	36	12	6
62	1	2	1a	0	0	1	0	36	0	36	12	7
53	1	1	1a	0	0	1	0	36	0	36	12	4
72	1	2	1a	0	0	1	0	37	0	37	12	6
47	0	4	1b	0	0	1	1	22	0	37	12	6
49	0	2	1a	0	0	1	0	37	0	37	12	5
68	1	2	3a	0	0	3	0	38	0	38	12	3
78	1	2	1a	0	0	1	0	38	0	38	12	7
76	1	2	1a	0	0	1	0	38	0	38	12	8
69	1	4	2a	0	0	2	0	38	0	38	12	6
41	1	2	1a	0	0	1	0	38	0	38	12	8
62	0	2	1b	0	0	1	0	39	0	39	12	7
54	1	1	3a	0	0	3	0	39	0	39	12	9
51	1	3	1a	0	0	1	0	39	0	39	12	6
63	0	2	1b	0	0	1	0	39	0	39	12	8
69	0	2	1b	0	0	1	0	40	0	40	12	3
55	0	1	1b	0	0	1	0	40	0	40	12	6
49	1	2	1a	0	0	1	0	40	0	40	12	12
54	0	2	1a	0	0	1	0	40	0	40	12	7
53	0	4	1a	0	0	1	0	41	0	41	12	9
67	1	2	1b	0	0	1	0	41	0	41	12	6
38	1	2	1a	0	0	1	0	41	0	41	12	6
46	1	2	1a	0	0	1	0	42	0	42	12	4
54	0	4	1b	0	0	1	0	42	0	42	12	1
41	0	2	2b	0	0	2	1	33	0	42	12	0
65	1	4	1b	0	0	1	1	0	0	42	12	0
53	0	2	1a	0	0	1	0	42	0	42	12	8
59	0	2	1a	0	0	1	0	42	0	42	12	9
45	0	2	1a	0	0	1	0	42	0	42	12	4
68	0	4	3a	0	0	3	0	42	0	42	12	9
49	1	2	1a	0	0	1	0	43	0	43	12	2
51	1	2	1a	0	0	1	0	44	0	44	12	7
66	1	2	1b	0	0	1	0	45	0	45	12	#N/A
52	1	2	1a	0	0	1	0	45	0	45	12	#N/A
72	1	1	1a	0	0	1	0	45	0	45	12	#N/A
64	1	3	2a	0	0	2	0	45	0	45	12	8
47	1	1	1b	0	0	1	0	46	0	46	12	3
56	0	2	1b	0	0	1	0	49	0	49	12	8
49	0	2	3a	0	0	3	0	49	0	49	12	0
52	1	2	1a	0	0	1	0	57	0	57	12	9
88	1	2	1a	0	0	1	0	61	0	61	12	7
32	0	2	1a	0	0	1	0	61	0	61	12	8
